# Supplementary material for: The omega-3 and Nano-curcumin effects on vascular cell adhesion molecule (VCAM) in episodic migraine patients: a randomized clinical trial
Source: PubMed Central journal article supplement (PMC8305494; doi:10.1186/s13104-021-05700-x), 2021-07-23
Supplement: 13104_2021_5700_MOESM1_ESM.pdf [file 13104_2021_5700_MOESM1_ESM.pdf]

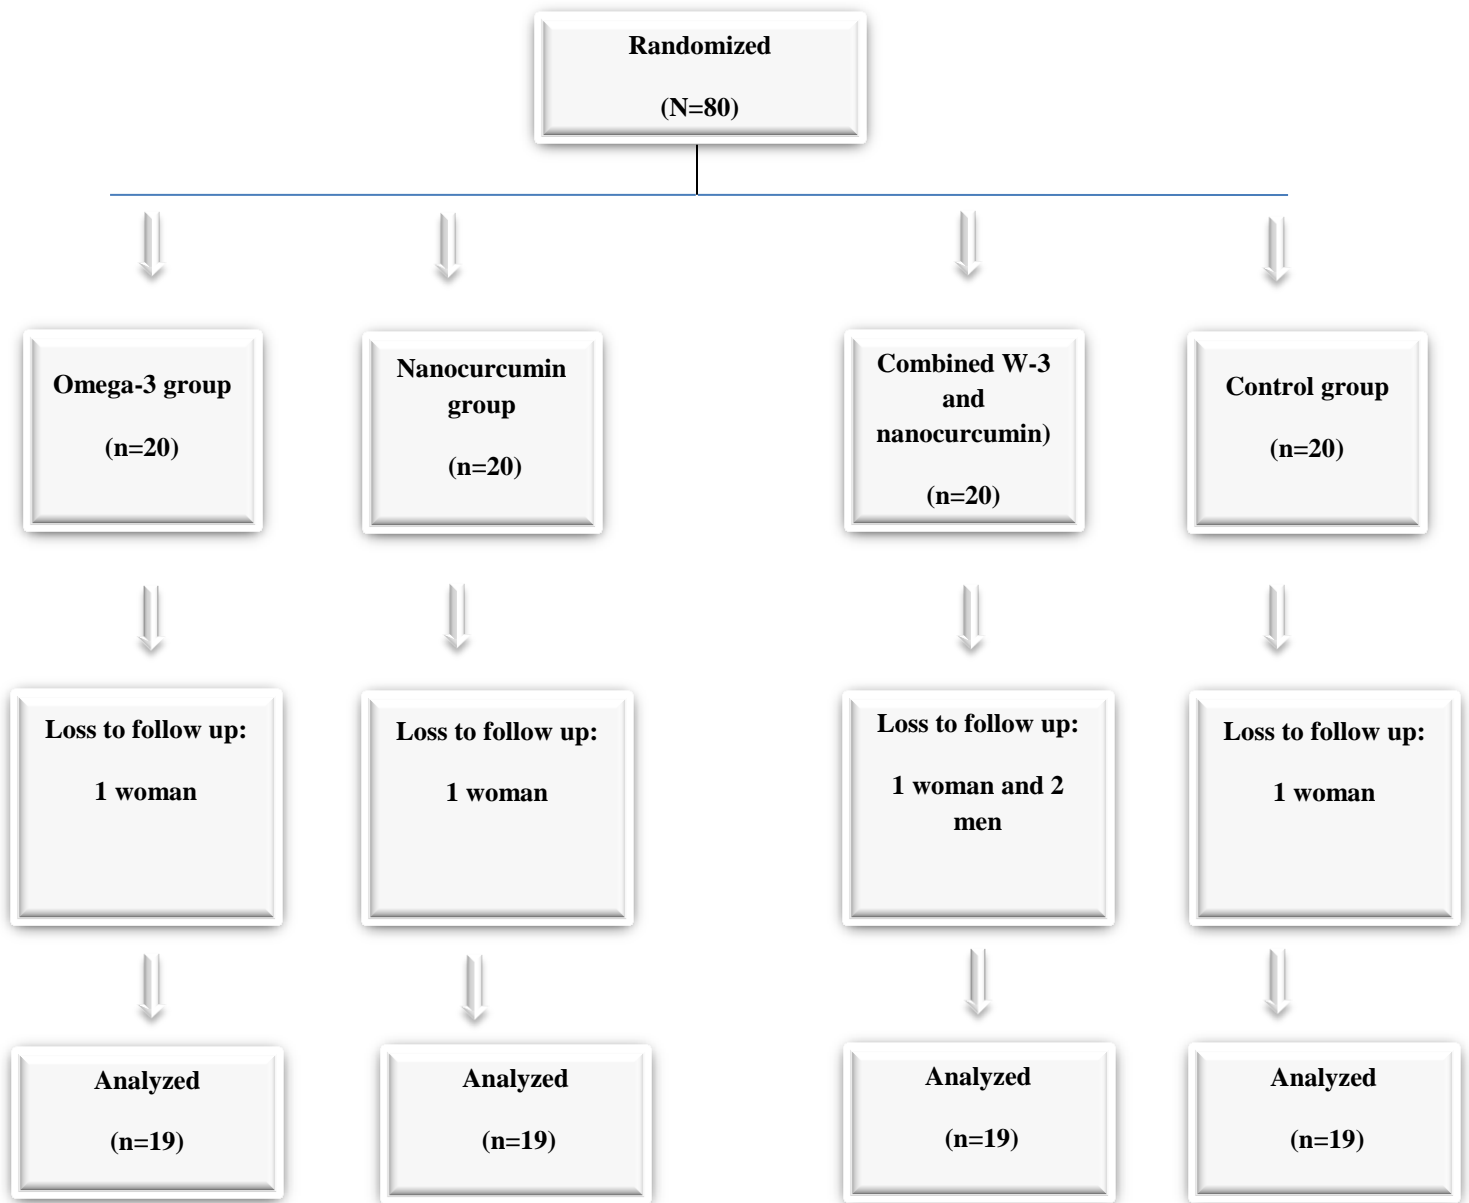

**Figure 1.** Flow chart for the trial
